# Supplementary material for: Novel self-regenerative and non-flammable high-performance hydrogel electrolytes with anti-freeze properties and intrinsic redox activity for energy storage applications
Source: Royal Society of Chemistry journal article supplement (doi:10.1039/d3ta02499g), 2023-01-01
Supplement: d3ta02499g2.pdf [file d3ta02499g2.pdf]

### Electronic Supplementary Information

## Novel Self-Regenerative and Non-Flammable High-Performance Hydrogel Electrolyte with Anti-Freeze Properties and Intrinsic Redox Activity for Energy Storage Applications

Abdelrahman A. M. Ismail, Loujain G. Ghanem, Abdallah A. Akar, Ghada E. Khedr, Mohamed Ramadan, Basamat S. Shaheen, Nageh K. Allam\*

Energy Materials Laboratory (EML), School of Sciences and Engineering, The American University in Cairo, New Cairo 11835, Egypt

\* Corresponding Author's Email: [nageh.allam@aucegypt.edu](mailto:nageh.allam@aucegypt.edu)

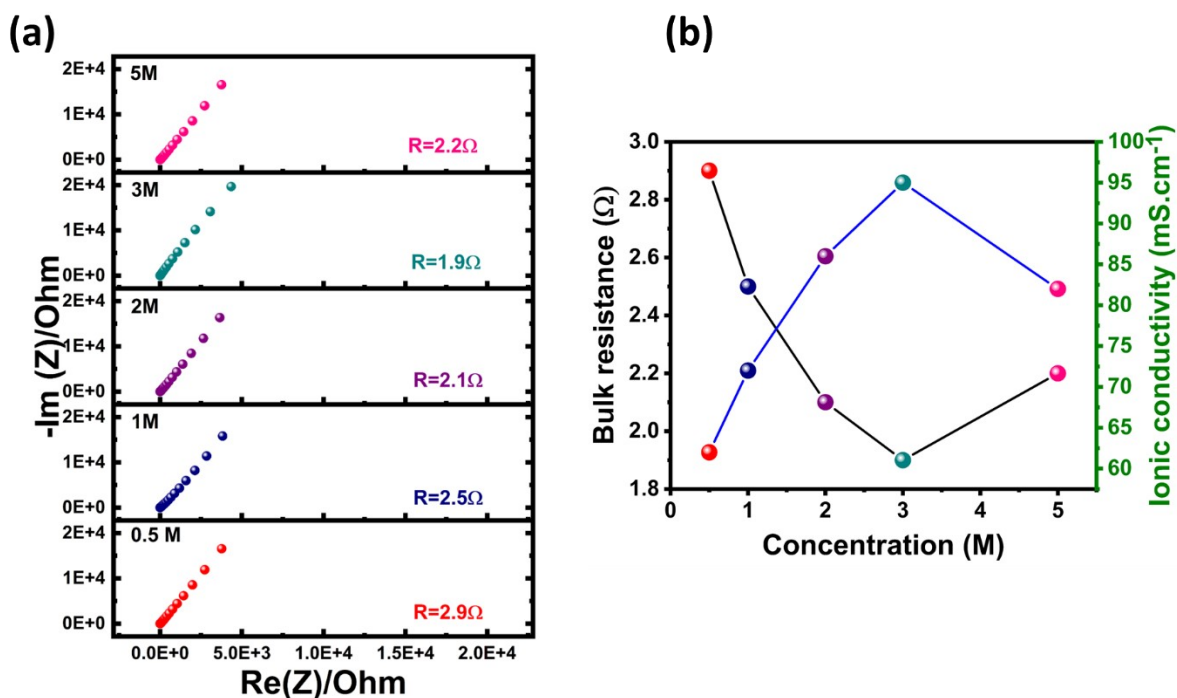

**Figure S1.** (a) shows the impedance measurements for different concentrations from LiBr@PVA electrolyte, and (b) the relation between the resistance, ionic conductivity and the concentration.

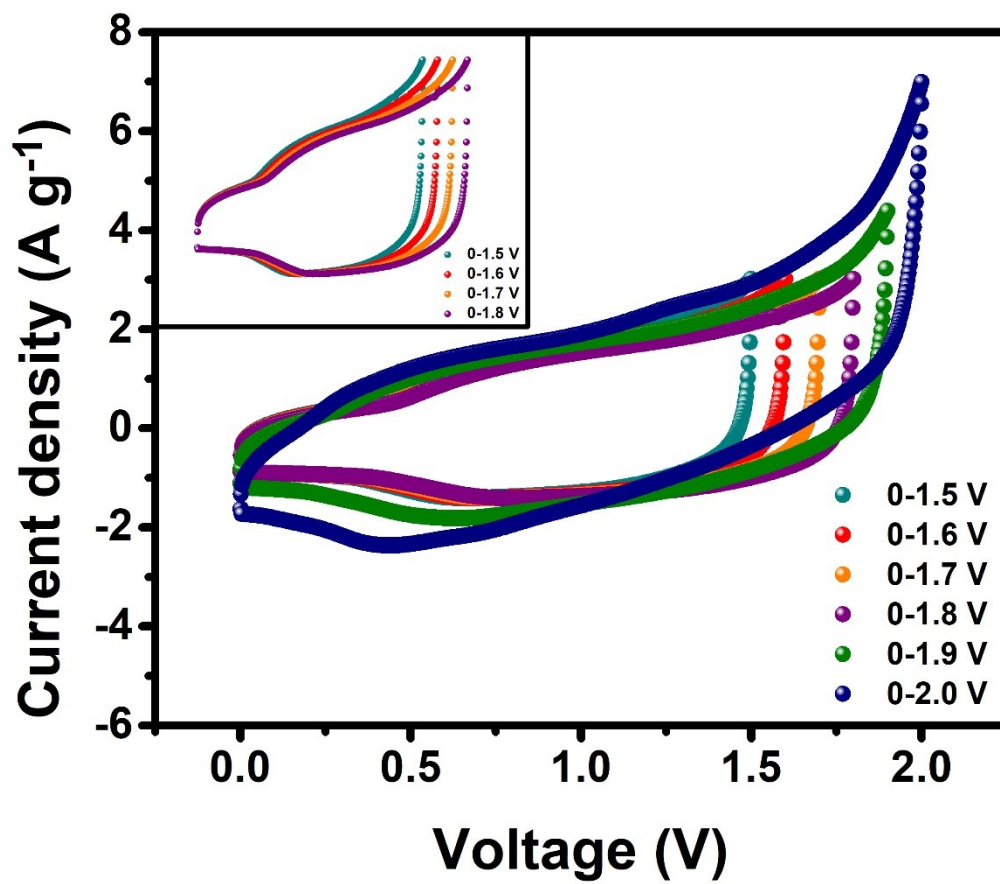

Figure S2. CVs different potential windows.

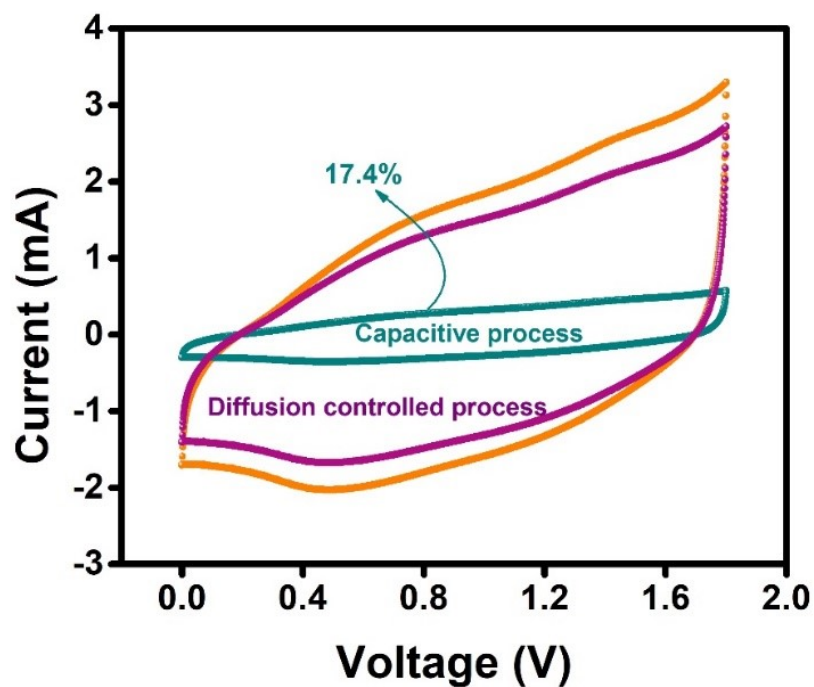

**Figure S3.** Dunn's theoretical calculations for LiBr @PVA at a moderate scan rate of 20 mV/s.

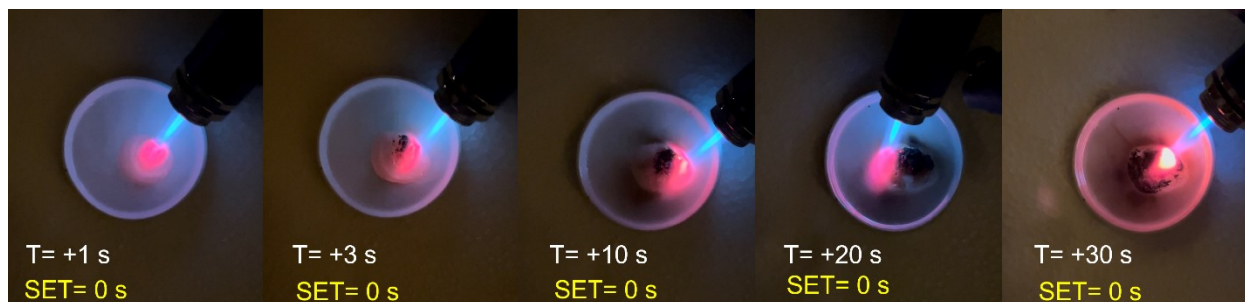

**Figure S4.** The self-extinguishing time (SET) for the flammability test of LiBr@ PVA hydrogel electrolyte.

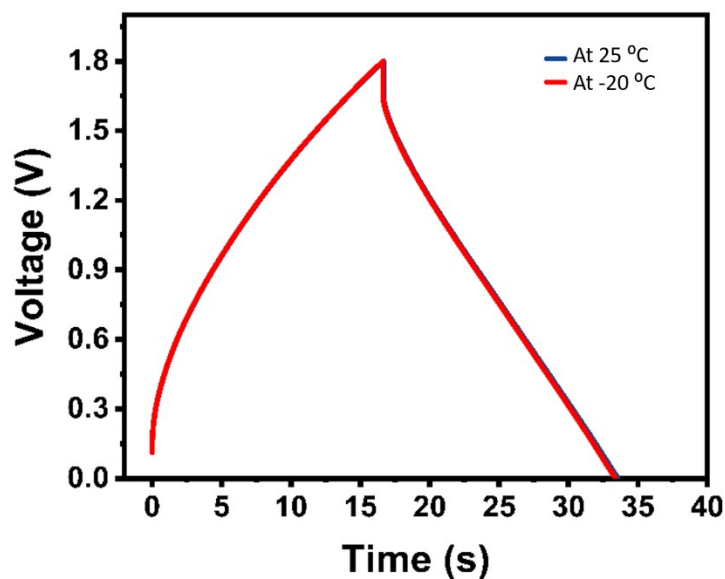

**Figure S5.** GCD response of the C/3-LiBr@PVAM/C device at room temperature and at - 20 °C.

**Table S1.** Comparison between the energy density of our device to the redox electrolytes-based devices reported in the literature.

| Device ( electrode-electrolyte)                                          | Energy Density<br>(Wh/Kg) | References                                                                                                  |
|--------------------------------------------------------------------------|---------------------------|-------------------------------------------------------------------------------------------------------------|
| This Work (AC- LiBr@PVA)                                                 | 20.5                      | This work                                                                                                   |
| AC/Reline + 1% Water                                                     | 18                        | <a href="https://doi.org/10.1039/D1EE02920G">https://doi.org/10.1039/D1EE02920G</a>                         |
| AC- PVA/H <sub>2</sub> SO <sub>4</sub> /Na <sub>2</sub> MoO <sub>4</sub> | 14.4                      | <a href="https://doi.org/10.1021/am402162b">https://doi.org/10.1021/am402162b</a>                           |
| AC-PVA/H <sub>2</sub> SO <sub>4</sub> /P-benzenediol                     | 11.31                     | <a href="https://doi.org/10.1016/j.jpowsour.2011.09.110">https://doi.org/10.1016/j.jpowsour.2011.09.110</a> |
| AC-PVA/H <sub>2</sub> SO <sub>4</sub> /indigo carmine                    | 13.26                     | <a href="https://doi.org/10.1039/C4TA06322H">https://doi.org/10.1039/C4TA06322H</a>                         |
| AC-PVA/H <sub>2</sub> SO <sub>4</sub> /hydroquinone                      | 20                        | <a href="https://doi.org/10.1039/C2RA21387G">https://doi.org/10.1039/C2RA21387G</a>                         |
